# Supplementary material
Source: PubMed Central journal article supplement (PMC1271802)

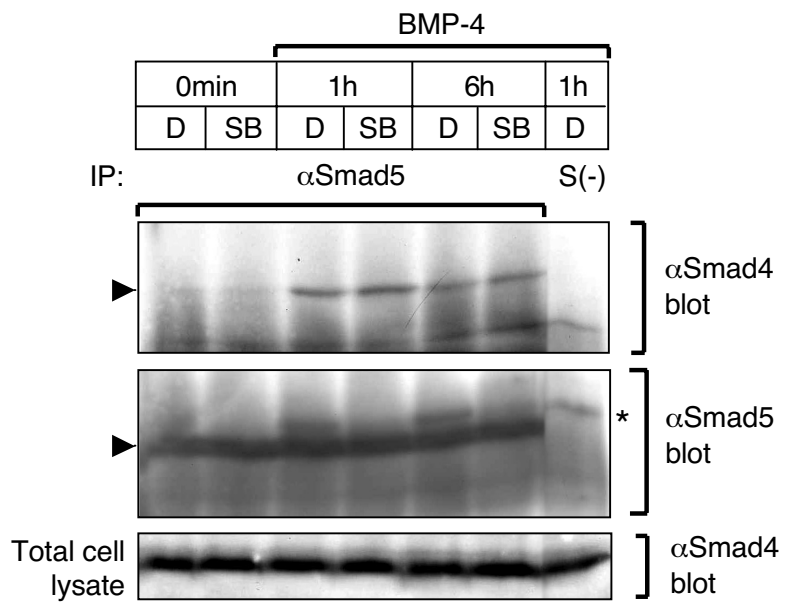

Supplement: 7600067s1.pdf [file 7600067s1.pdf]

**A**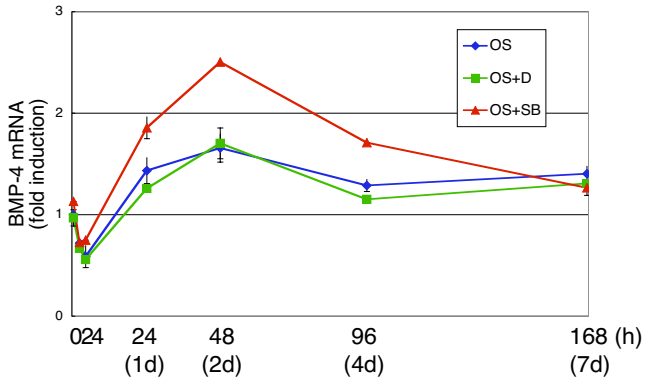**B**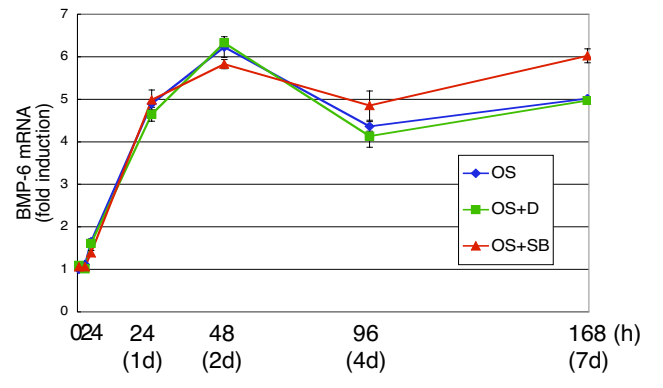

Supplement: 7600067s2.pdf [file 7600067s2.pdf]
